# Supplementary figures and images for: Intratumoral CD4+ T Cells Mediate Anti-tumor Cytotoxicity in Human Bladder Cancer
Source: PubMed Central journal article supplement — Cell. 2020 Jun 25;181(7):1612–1625.e13. doi: 10.1016/j.cell.2020.05.017 (PMC7321885; doi:10.1016/j.cell.2020.05.017), 2020-06-25

**A**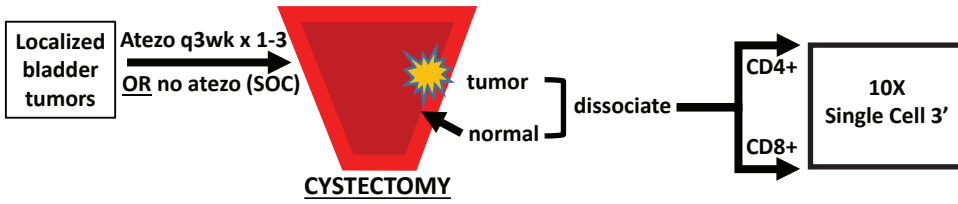**B**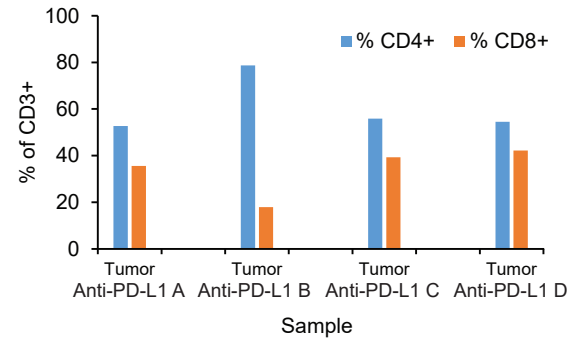**C**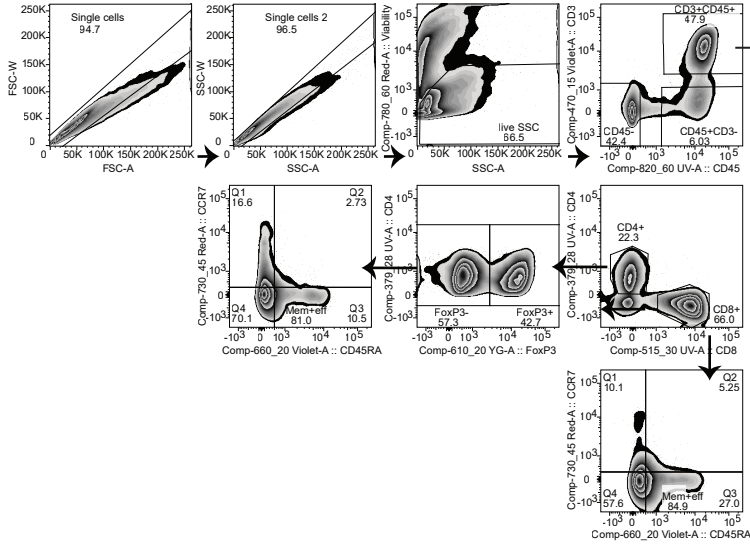**D**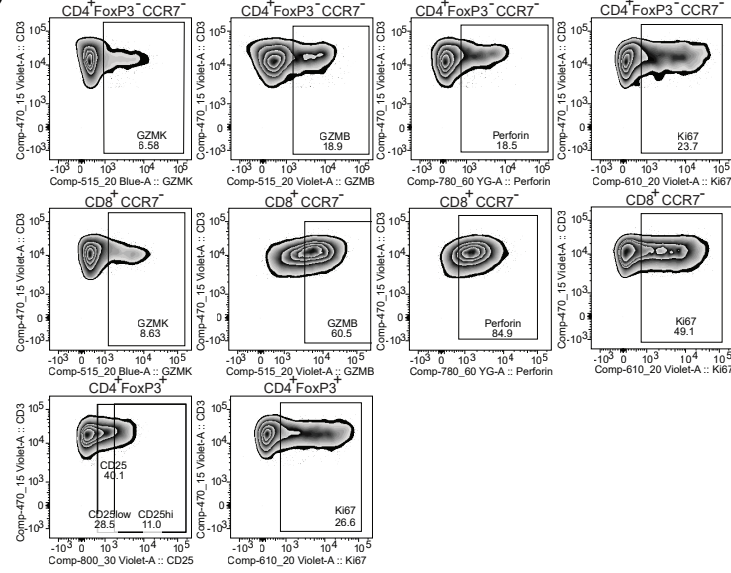**E**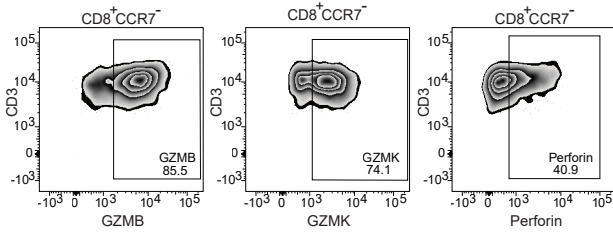**F**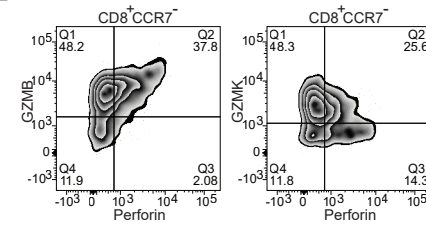**G**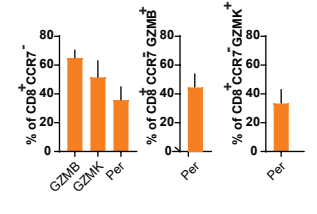**H**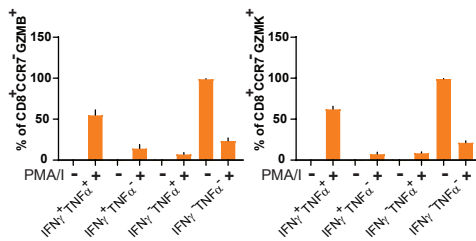**J**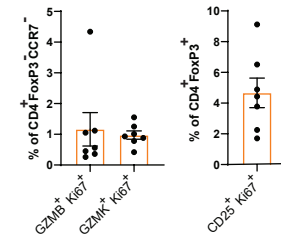**K**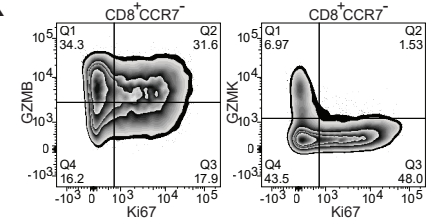**I**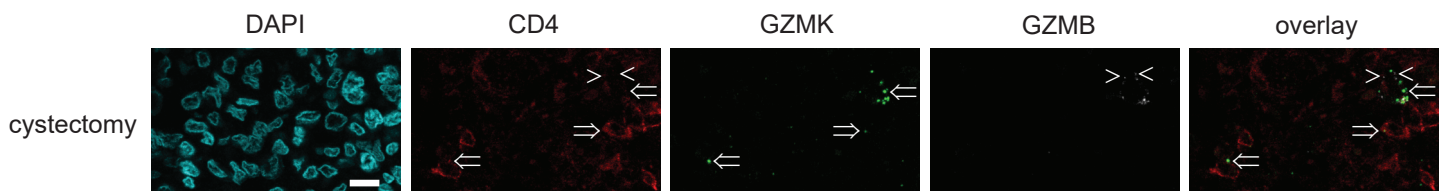

Supplement: NIHMS1594691-supplement-1.pdf [file NIHMS1594691-supplement-1.pdf]

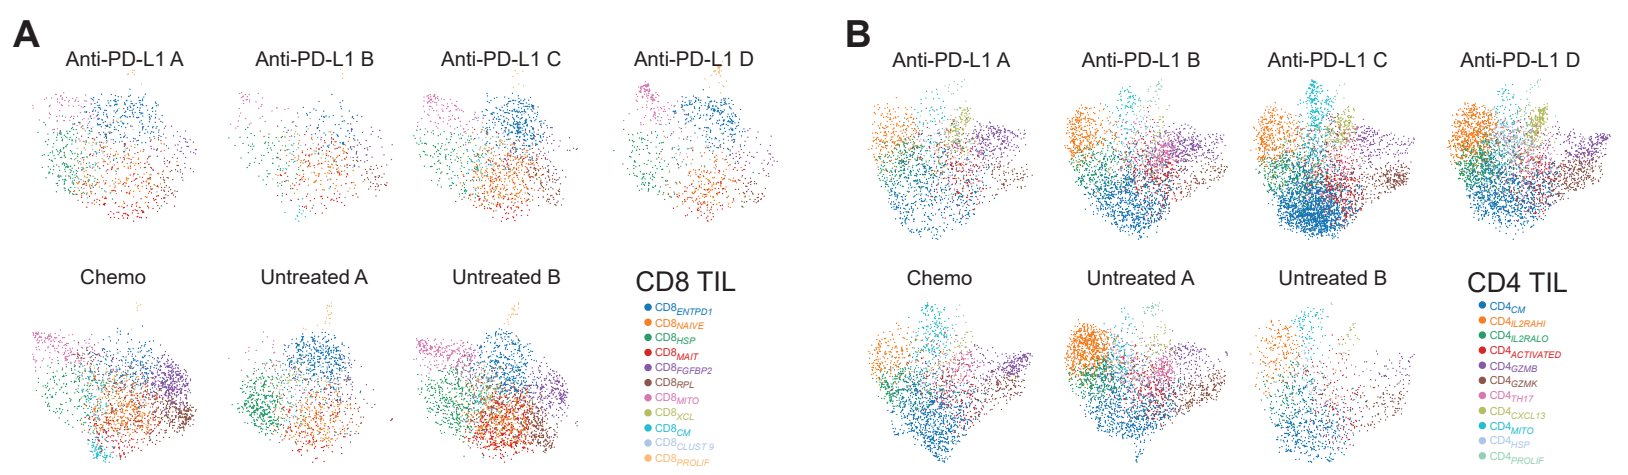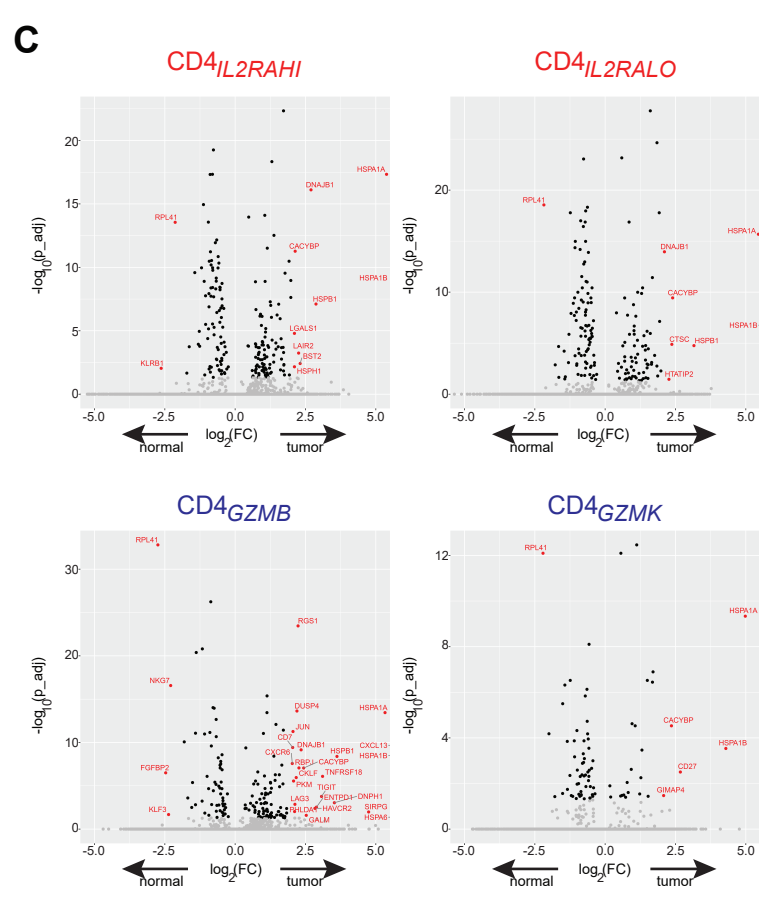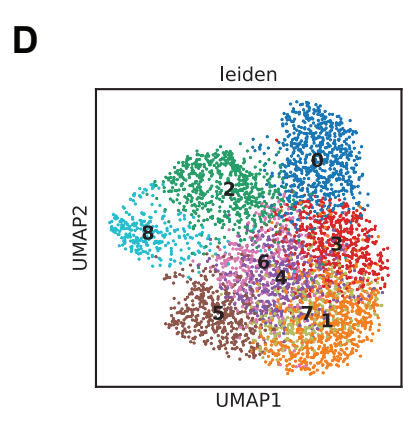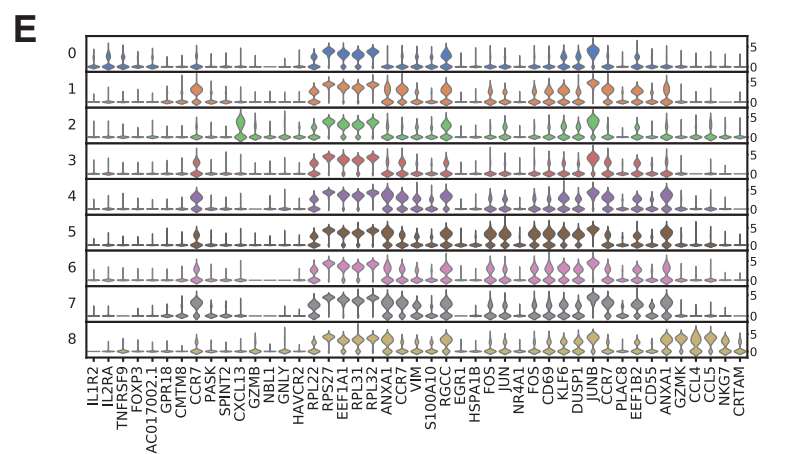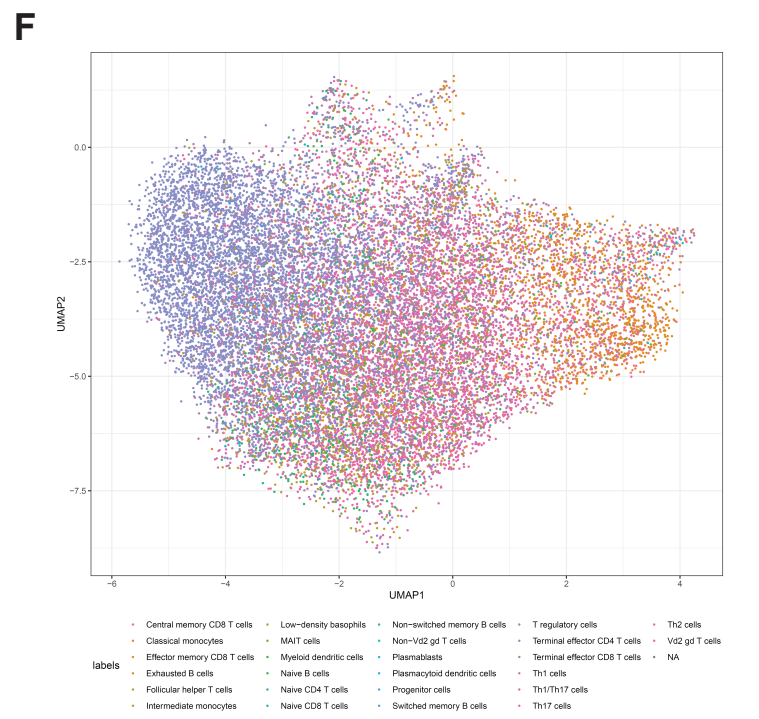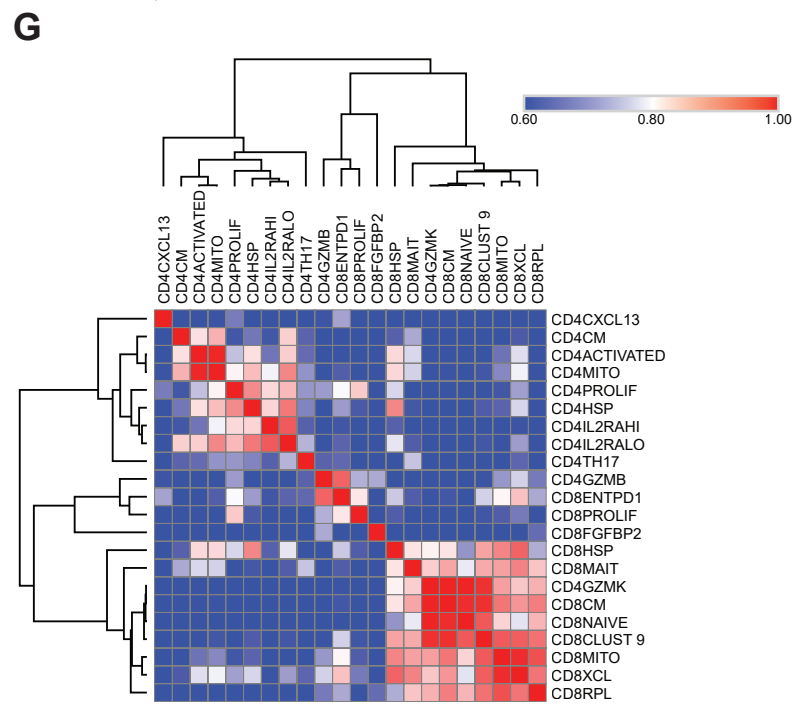

Supplement: NIHMS1594691-supplement-2.pdf [file NIHMS1594691-supplement-2.pdf]

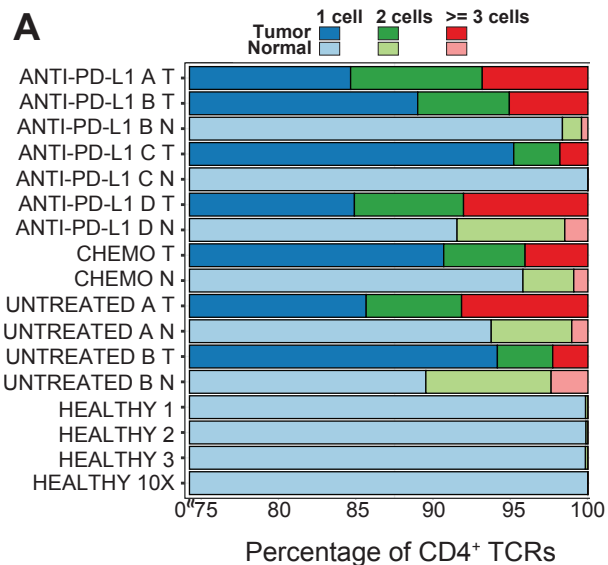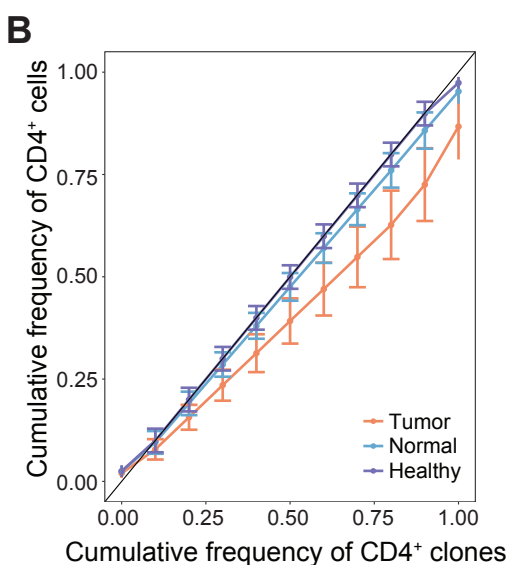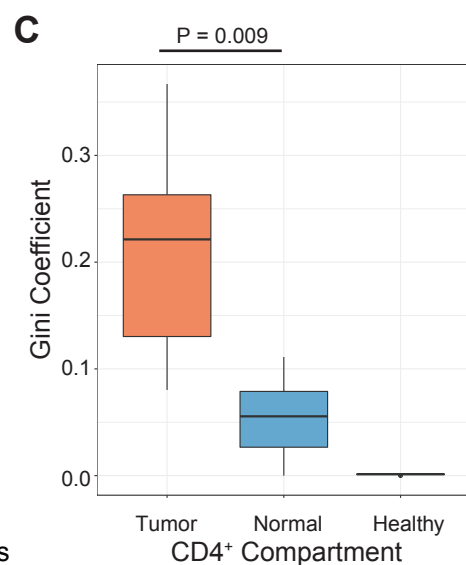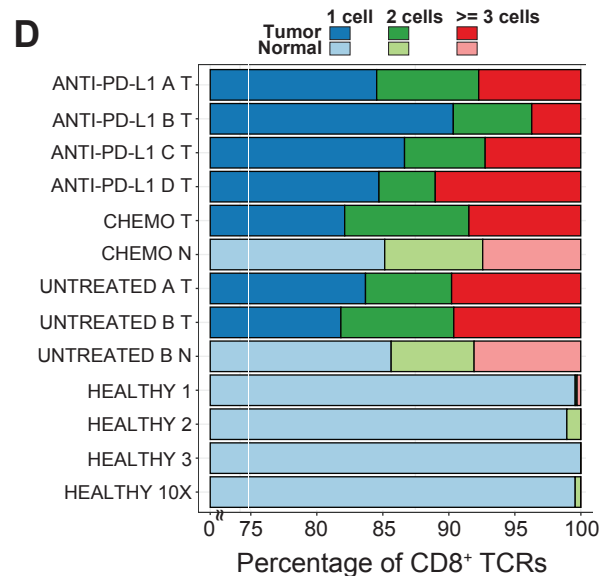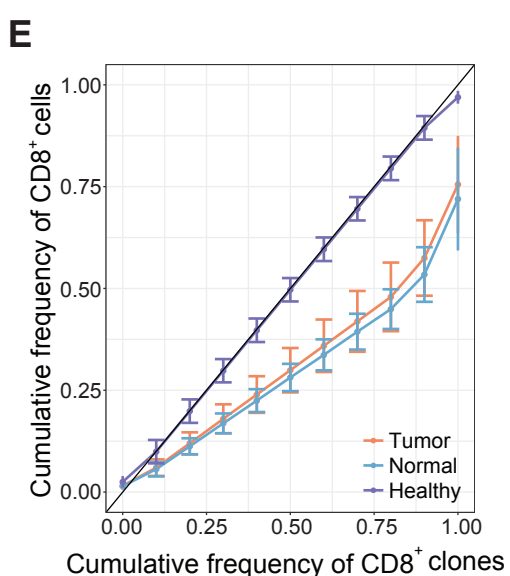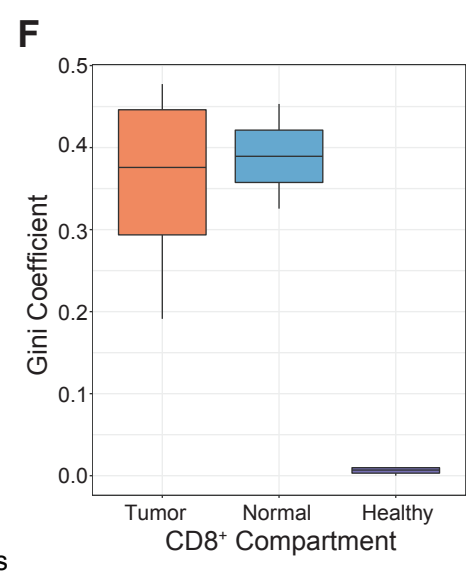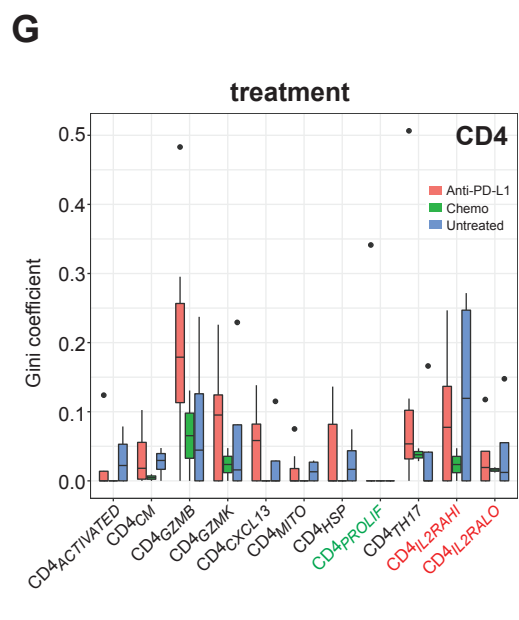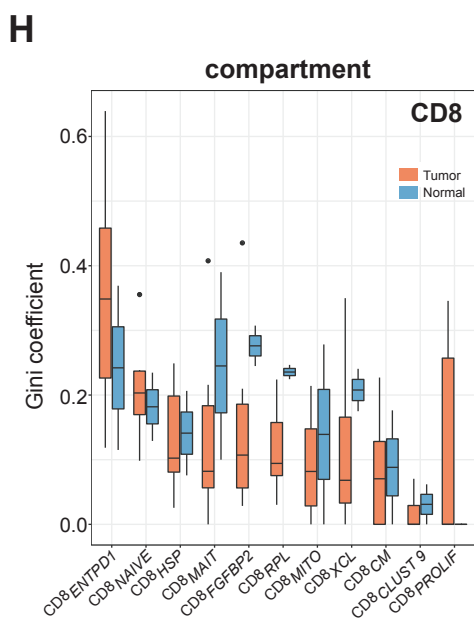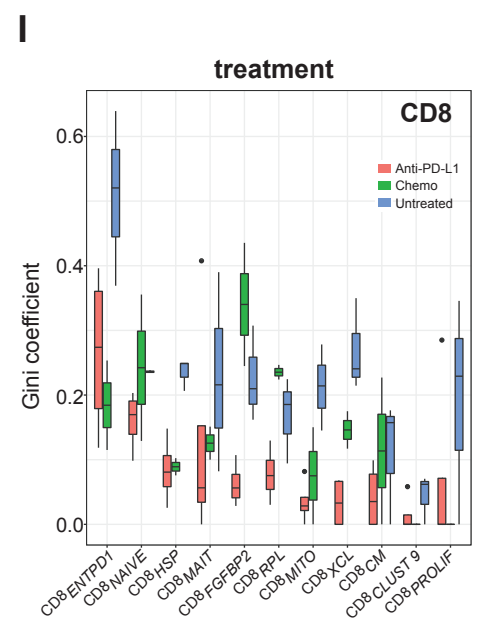

Supplement: NIHMS1594691-supplement-3.pdf [file NIHMS1594691-supplement-3.pdf]

**A**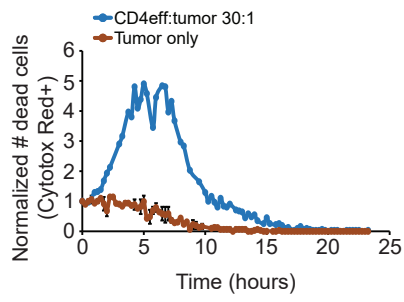**C**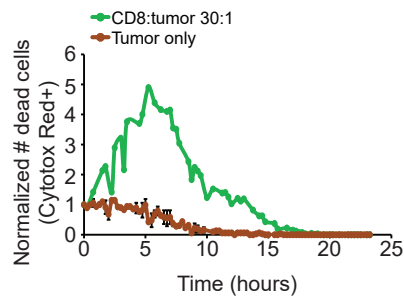**B**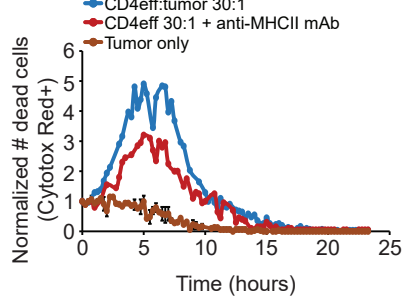**D**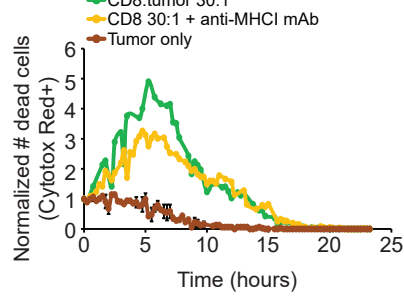

Supplement: NIHMS1594691-supplement-4.pdf [file NIHMS1594691-supplement-4.pdf]
